# Supplementary material
Source: PubMed Central journal article supplement (PMC6355474)
Supplement: 2018.201301_TAIANA_SUPPL.pdf [file 2018.201301_TAIANA_SUPPL.pdf]

**Long non-coding RNA NEAT1 shows high expression unrelated to molecular features and clinical outcome in multiple myeloma**

Elisa Taiana,<sup>1,2\*</sup> Domenica Ronchetti,<sup>1,2\*</sup> Vanessa Favasuli,<sup>1,2</sup> Katia Todoerti,<sup>1,2</sup> Martina Manzoni,<sup>1,2</sup> Nicola Amodio,<sup>3</sup> Pierfrancesco Tassone,<sup>3,4</sup> Luca Agnelli<sup>1,2</sup> and Antonino Neri<sup>1,2</sup>

<sup>1</sup>Department of Oncology and Hemato-oncology, University of Milan, Italy; <sup>2</sup>Hematology, Fondazione Cà Granda IRCCS Policlinico, Milan, Italy; <sup>3</sup>Department of Experimental and Clinical Medicine, Magna Graecia University of Catanzaro, Catanzaro, Italy and <sup>4</sup>Sbarro Institute for Cancer Research and Molecular Medicine, Center for Biotechnology, College of Science and Technology, Temple University, Philadelphia, PA, USA

\*ET and DR contributed equally to this work.

Correspondence: [antonino.neri@unimi.it](mailto:antonino.neri@unimi.it)  
doi:10.3324/haematol.2018.201301

# **Supplementary Materials**

## **Long non-coding RNA NEAT1 shows high expression unrelated to molecular features and clinical outcome in multiple myeloma**

Elisa Taiana,<sup>1,2\*</sup> Domenica Ronchetti,<sup>1,2\*</sup> Vanessa Favasuli,<sup>1,2</sup> Katia Todoerti,<sup>1,2</sup> Martina Manzoni,<sup>1,2</sup> Nicola Amodio,<sup>3</sup> Pierfrancesco Tassone,<sup>3,4</sup> Luca Agnelli,<sup>1,2</sup> Antonino Neri<sup>1,2</sup>

<sup>1</sup>Department of Oncology and Hemato-oncology, University of Milan, Italy

<sup>2</sup>Hematology, Fondazione Cà Granda IRCCS Policlinico, Milan, Italy

<sup>3</sup>Department of Experimental and Clinical Medicine, Magna Graecia University of Catanzaro, Catanzaro, Italy

<sup>4</sup>Sbarro Institute for Cancer Research and Molecular Medicine, Center for Biotechnology, College of Science and Technology, Temple University, Philadelphia, PA, US

### **Corresponding author:**

Antonino Neri, MD, PhD

Fax: +39 02-50320403

e-mail: [antonino.neri@unimi.it](mailto:antonino.neri@unimi.it)

## Supplementary Materials and Methods

### Samples

We investigated a cohort of 50 MM patients representative of the major molecular characteristics of the disease, 9 primary PCLs (pPCL) and 6 secondary PCLs (sPCL) and four normal controls (purchased from Voden, Medical Instruments IT) (Table 1). PCs (>90%) were purified from bone marrow aspirates using CD138 immunomagnetic microbeads (MidiMACS system, Miltenyi Biotec, Auburn, CA). All the samples were characterized by fluorescence in situ hybridization (FISH) for the ploidy status and the presence of 17p13 or 13q14 deletions, 1q gain and the most frequent IGH chromosomal translocations t(11;14), t(4;14), t(14;16) and t(14;20), as previously described.<sup>1</sup> The mutations pattern of *BRAF*, *NRAS*, *KRAS*, *P53*, *FAM46C* and *DIS3* genes have been previously investigated by next-generation sequencing.<sup>2-4</sup> Written informed consent was obtained from all patients in accordance with the declaration of Helsinki. The study was approved by the Ethical Committee of the University of Milan (N° 24/15, May 06 2015).

### Gene Expression Profiling

All MM and PCL patients along with the 4 BM PC normal controls were profiled on GeneChip® Human Gene 2.0 ST arrays (Affymetrix Inc., Santa Clara, CA). Total RNA samples were processed according to manufacturer's procedure. Normalized expression values were obtained using Robust Multi Array Average (RMA) procedure and annotations based on GENCODE v25, Ensembl v87 (Chip Definition File available at <http://brainarray.mbni.med.umich.edu/Brainarray/Database/CustomCDF/21.0.0/genecodet.asp>). CDF file was customized in order to withdraw probes that map to regions where ambiguous detection due to transcript overlap might occur. In this way, the expression levels of 10138 unique lncRNAs were obtained. The list of differentially expressed genes or lncRNAs between high and low *NEAT1* expressing samples was gathered by Significant Analysis of Microarrays v5.00, using the tool provided for the *shiny* package in R software (<https://github.com/MikeJSeo/SAM>), as previously described.<sup>5</sup>

The list of differentially expressed genes was submitted to the ToppGene Suite portal (<http://toppgene.cchmc.org>) for functional enrichment analysis using the ToppFun application. Microarray data were globally analyzed by Gene Set Enrichment Analysis (GSEA, software v.2.2.1).<sup>6</sup> Gene sets were considered significant with nominal p-value < 0.05. All the data have been deposited in the NCBI Gene Expression Omnibus database (GEO; <http://www.ncbi.nlm.nih.gov/geo>) and are accessible under accession #GSE116294.

### RNA sequencing (RNA-seq)

The sequencing data have been previously generated and were publicly available at GEO repository under accession #GSE109342. Transcript abundance was estimated as previously described<sup>7</sup> and was reported as FPKM, Fragments Per Kilobase per Million mapped reads. *Cufflinks* estimates a likelihood of relative abundances for all the possible sets of transcripts based on the identified 'incompatible' fragments that stemmed from differently spliced mRNA isoforms, producing a numerical value that best explains the observed fragments.

### Quantitative real-time PCR (qRT-PCR)

For qRT-PCR, 100 ng of total RNA underwent reverse transcription using random primer mix and reagents from INVITROGEN (Life Technologies, Foster City, CA). Real-time PCR to validate *NEAT1* was performed using 10 ng of total RNA and SYBR™ Green master mix with custom primers (Supplementary Table S3) as previously described.<sup>5</sup>

### Statistical analysis

Conventional statistical tests were applied as reported in the manuscript using standard functions in base R package (Kendall Tau correlation, Pearson correlation, Dunn test, and Wilcoxon rank-sum tests).

We used the Cox proportional hazards model in the *globaltest* function of R software (with 100,000 permutation) to test the association between NEAT1 expression levels, assumed as continuous variables and overall survival (OS) or time to next treatment (TNT) as clinical outcome.

1. Agnelli L, Fabris S, Biccato S, et al. Upregulation of translational machinery and distinct genetic subgroups characterise hyperdiploidy in multiple myeloma. *British journal of haematology*. 2007;136(4):565-573.
2. Lionetti M, Barbieri M, Manzoni M, et al. Molecular spectrum of TP53 mutations in plasma cell dyscrasias by next generation sequencing: an Italian cohort study and overview of the literature. *Oncotarget*. 2016;7(16):21353-21361.
3. Lionetti M, Barbieri M, Todoerti K, et al. A compendium of DIS3 mutations and associated transcriptional signatures in plasma cell dyscrasias. *Oncotarget*. 2015;6(28):26129-26141.
4. Lionetti M, Barbieri M, Todoerti K, et al. Molecular spectrum of BRAF, NRAS and KRAS gene mutations in plasma cell dyscrasias: implication for MEK-ERK pathway activation. *Oncotarget*. 2015;6(27):24205-24217.
5. Ronchetti D, Agnelli L, Taiana E, et al. Distinct lncRNA transcriptional fingerprints characterize progressive stages of multiple myeloma. *Oncotarget*. 2016;7(12):14814-14830.
6. Subramanian A, Tamayo P, Mootha VK, et al. Gene set enrichment analysis: a knowledge-based approach for interpreting genome-wide expression profiles. *ProcNatlAcadSciUSA*. 2005;102(43):15545-15550.
7. Ronchetti D, Agnelli L, Pietrelli A, et al. A compendium of long non-coding RNAs transcriptional fingerprint in multiple myeloma. *Scientific reports*. 2018;8(1):6557.
8. Tusher VG, Tibshirani R, Chu G. Significance analysis of microarrays applied to the ionizing radiation response. *ProcNatlAcadSciUSA*. 2001;98(9):5116-5121.

**Supplementary Figure S1.** Boxplot of NEAT1 expression does not show any significant correlation with group membership defined by deletions of chromosome 13q, 17p13, and gain of chromosome 1q, the presence of mutations of the MAPK-pathway (*BRAF*, *NRAS*, or *KRAS*), *DIS3* or *FAM46C*.

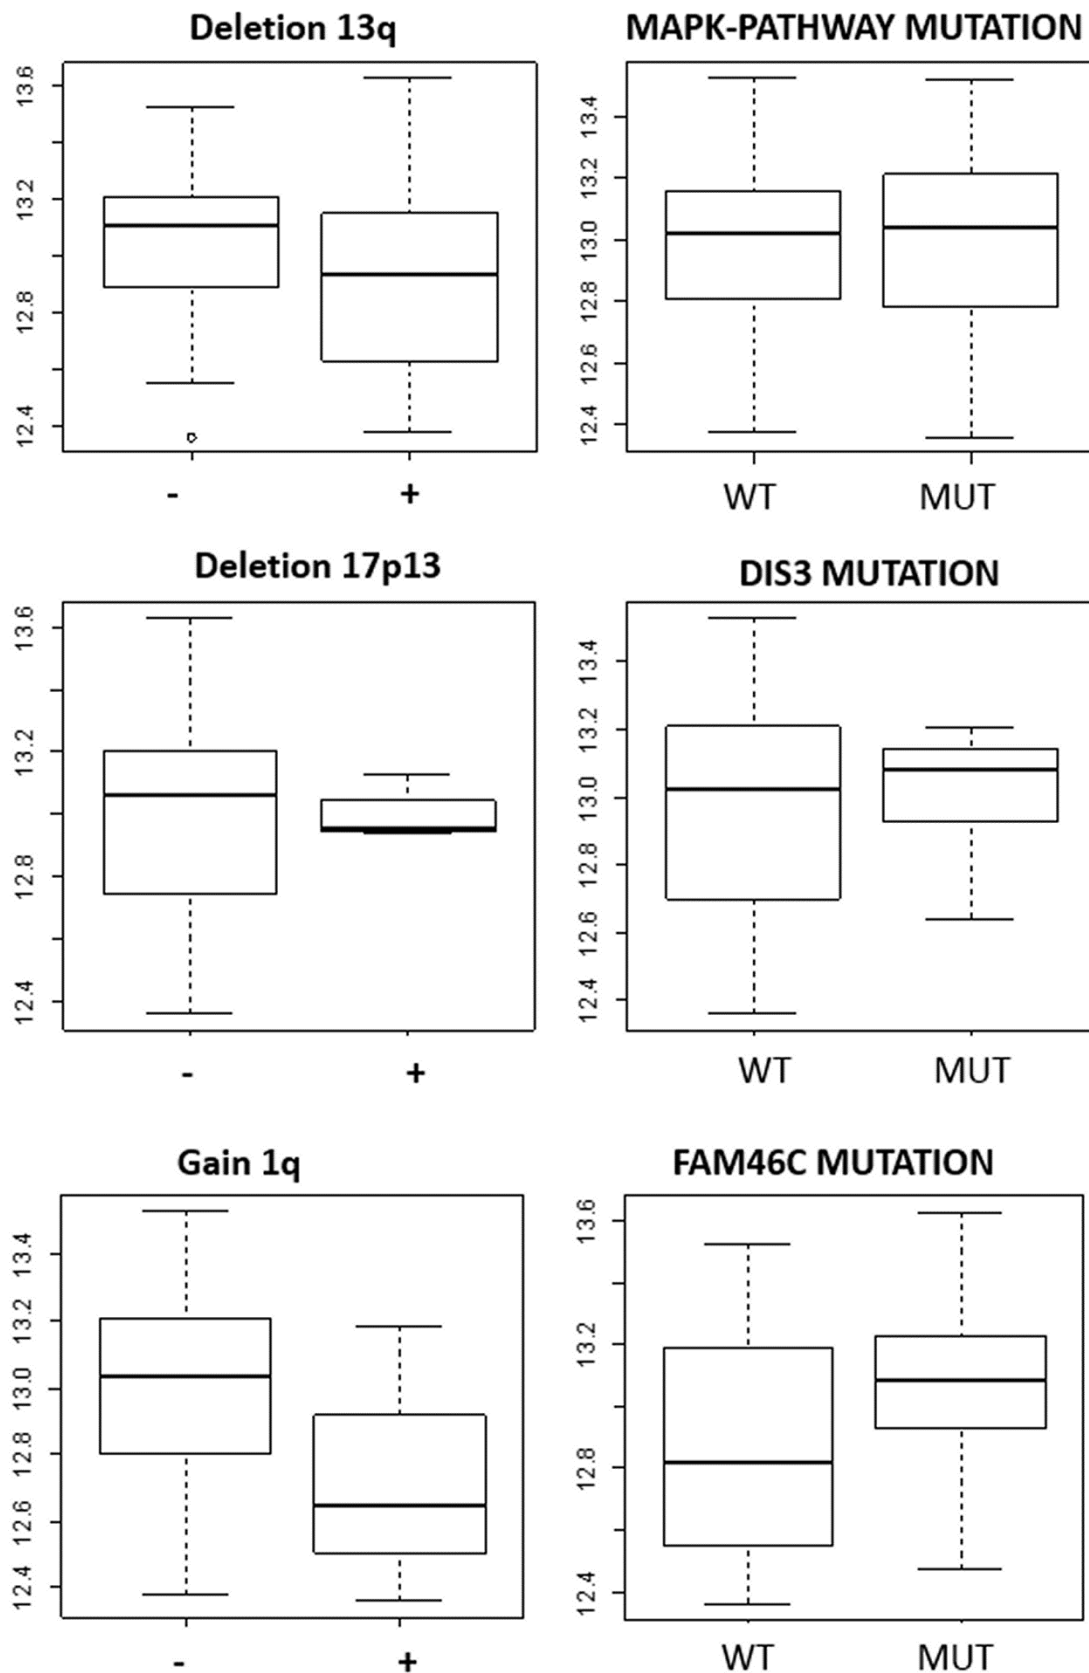

**Supplementary Figure S2. A.** Validation of GEP results by qRT-PCR with the 5'-primers. PCR data are represented by grouped-columns with the  $2^{-\Delta C_t}$  scale on the right side; GEP data are reported as histogram with the corresponding log-scale at the left side, the dotted tendency line is also indicated.

**B.** Validation of RNA-seq data by qRT-PCR with the 5'-primers. PCR data are represented by grouped-columns with the  $2^{-\Delta C_t}$  scale on the right side; RNA-seq data are reported as histogram with the corresponding scale at the left side. For both graphs, Kendall coefficient and significance are reported.

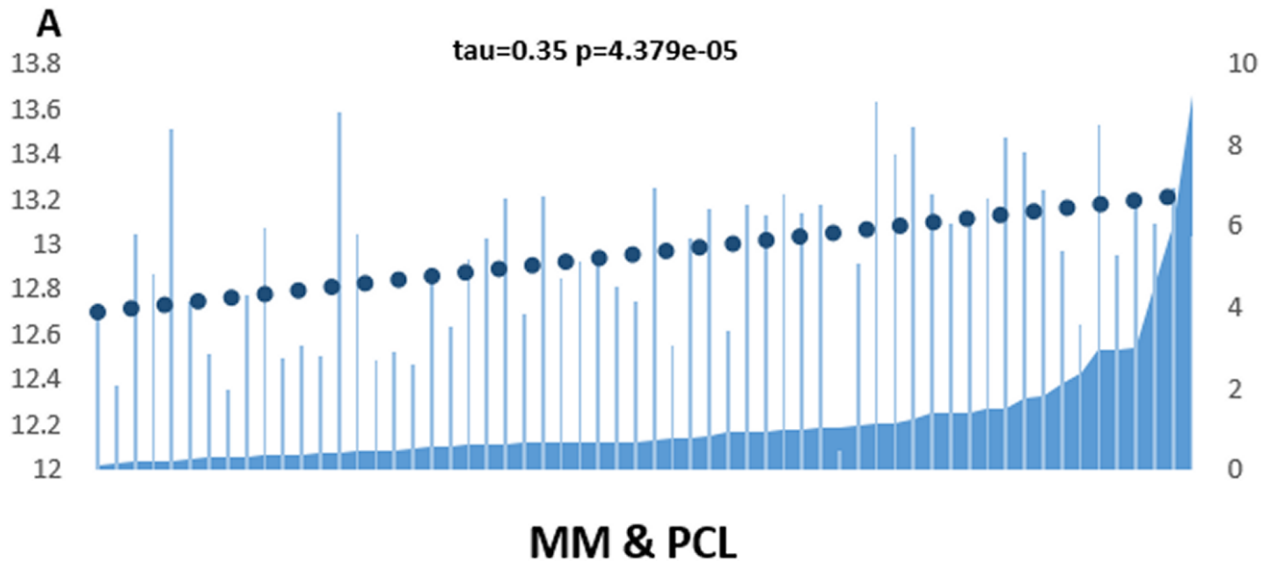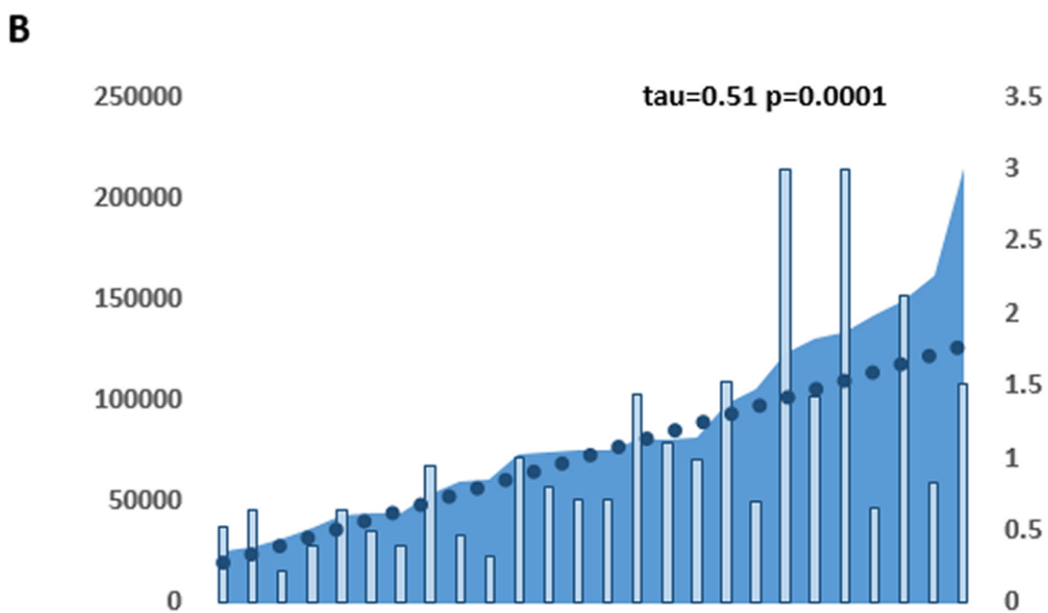

**Supplementary Figure S3.** Boxplot of NEAT1 qRT-PCR expression in MM/PCL versus 5 smoldering MM samples in proprietary dataset.

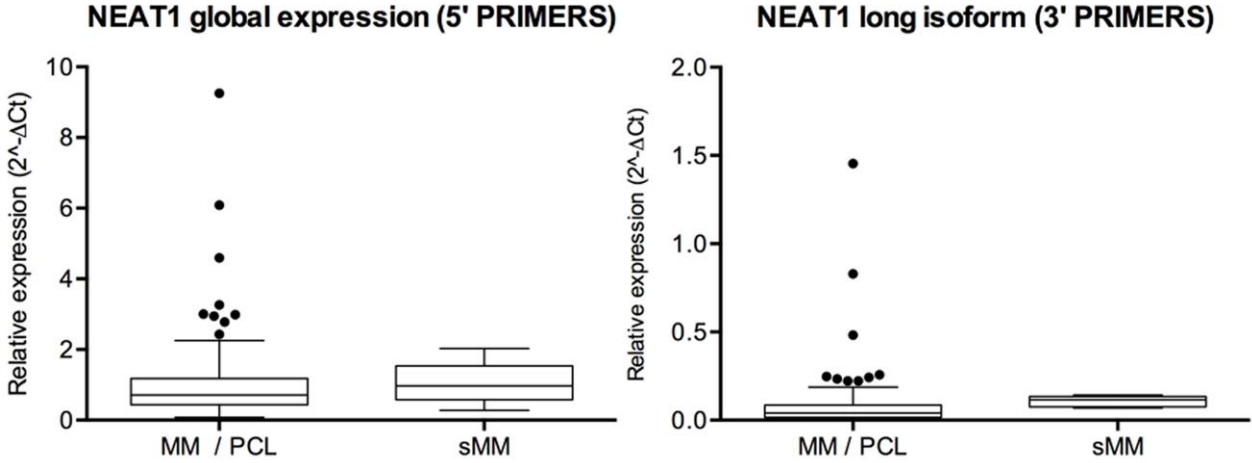

**Supplementary Figure S4.** Boxplot of NEAT1 isoform expression in healthy donors, MGUS, smoldering MM and MM samples from GSE5900 and GSE2658 microarray series (legend indicates Kruskal test P-value; \*=Dunn's test  $P < 0.05/2$ ).

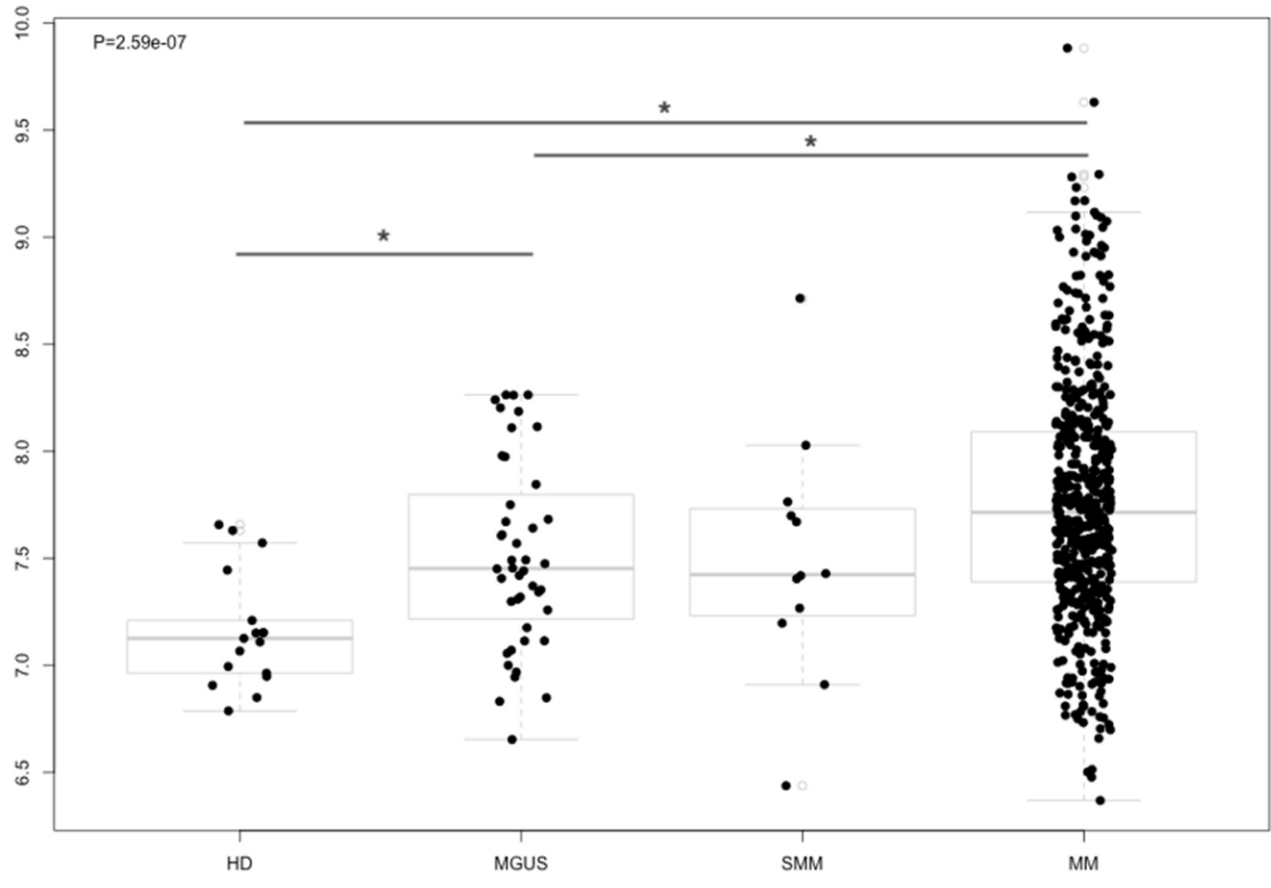



**Supplementary Figure S5.** Pearson analysis correlating NEAT1 total expression (x-axis) with the NONO or SFPQ (y-axis). R correlation coefficient and significance are reported.

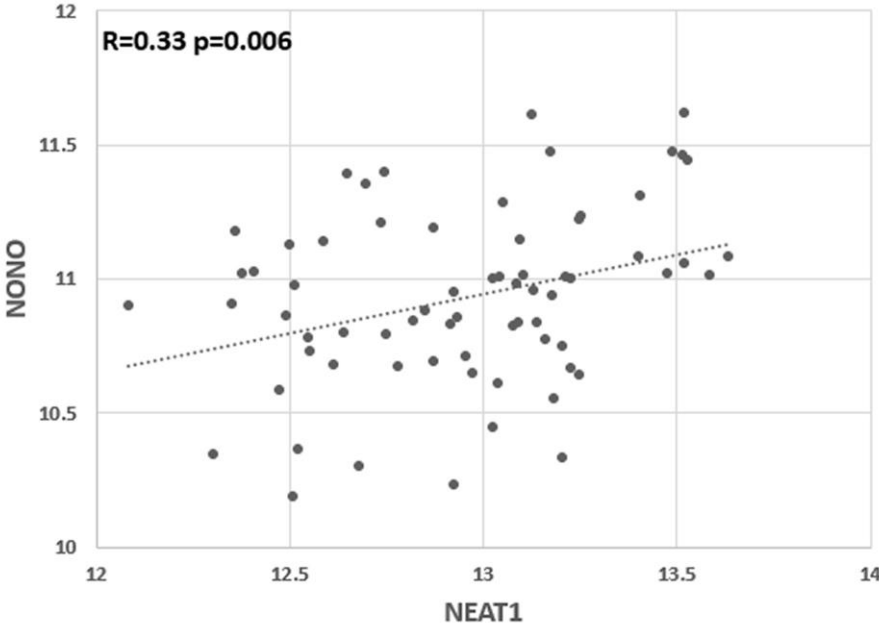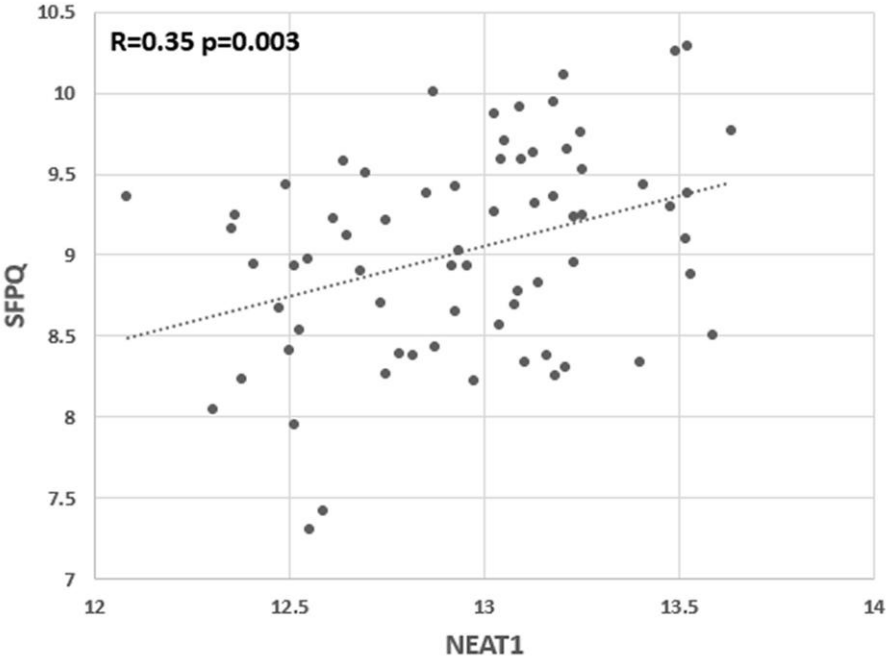

**Supplementary Figure S6:** Boxplot of NEAT1 qRT-PCR expression in 12 paired samples at onset and at relapse.

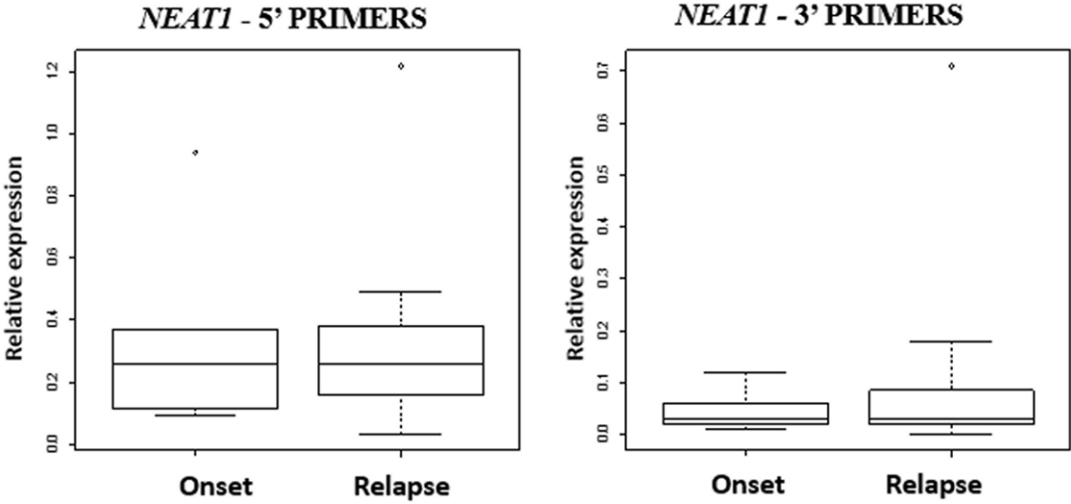

**Supplementary Figure S7:** Kaplan – Meier estimated curves of the two groups defined by NEAT1\_1 isoform high (blue) and low (red) expression levels in GSE2658 dataset. For representation, data stratified on the median expression level are shown.

### NEAT1 GSE2658

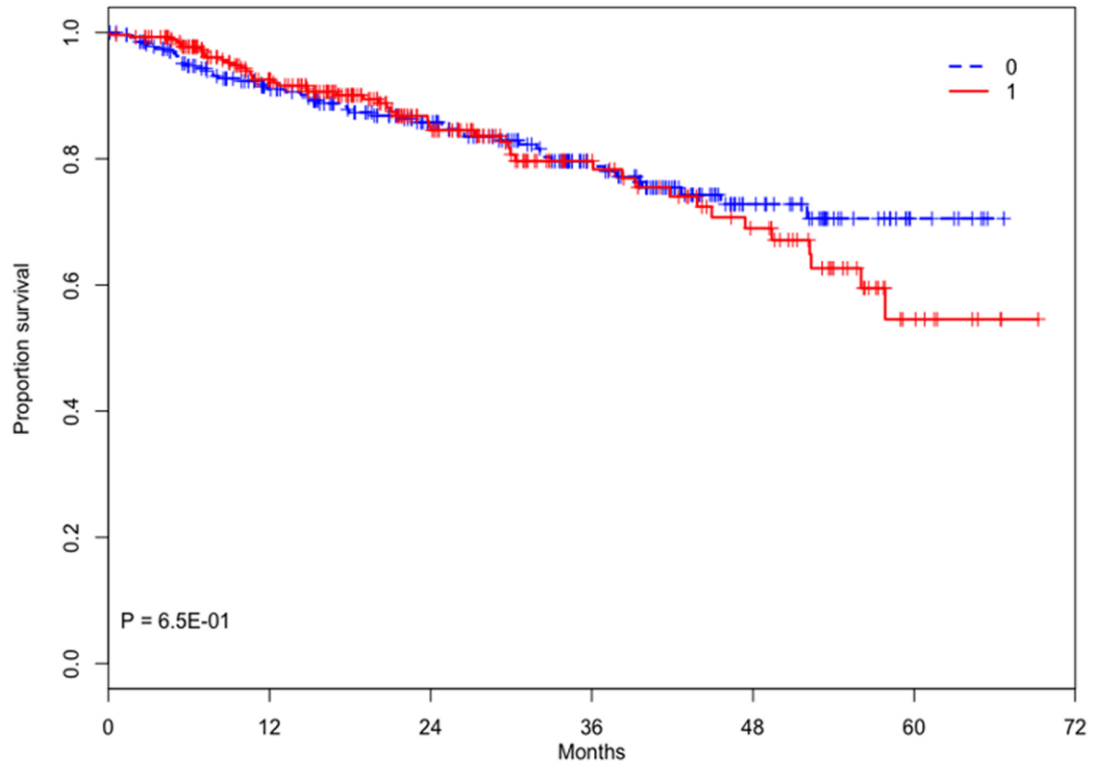

. At Risk

|   |     |     |     |    |    |   |   |
|---|-----|-----|-----|----|----|---|---|
| 0 | 276 | 210 | 156 | 99 | 41 | 8 | 0 |
| 1 | 277 | 200 | 111 | 60 | 39 | 9 | 0 |

**Supplementary Table S1.** Molecular characteristics of 50 MM and 15 PCL patients.

| Sample Features | MM           |              |               | PCL          |              |               |
|-----------------|--------------|--------------|---------------|--------------|--------------|---------------|
|                 | Positive (%) | Negative (%) | Not available | Positive (%) | Negative (%) | Not available |
| HD              | 15 (30)      | 32 (64)      | 3             | 0            | 15 (100)     | 0             |
| t(11;14)        | 12 (24)      | 38 (76)      | 0             | 3(20)        | 12(80)       | 0             |
| t(4;14)         | 12 (24)      | 38 (76)      | 0             | 3(20)        | 12(80)       | 0             |
| MAF-trx         | 5 (10)       | 45 (90)      | 0             | 6(40)        | 9(60)        | 0             |
| none            | 3 (6)        | 47 (94)      |               | 3(20)        | 12(80)       |               |
| del(17)         | 3 (6)        | 46 (92)      | 1             | 6(40)        | 9(60)        | 0             |
| del(13)         | 27 (54)      | 23 (46)      | 0             | 9(60)        | 6(40)        | 0             |
| 1q-gain         | 24 (48)      | 20 (40)      | 6             | 7(47)        | 6(40)        | 2             |
| <i>N-RAS</i>    | 8 (16)       | 33 (66)      | 9             | 1(7)         | 11(73)       | 3             |
| <i>K-RAS</i>    | 12 (24)      | 29 (58)      | 9             | 1(7)         | 12(80)       | 2             |
| <i>BRAF</i>     | 5 (10)       | 36 (72)      | 9             | 3(20)        | 10(67)       | 2             |
| <i>DIS3</i>     | 9 (18)       | 32 (64)      | 9             | 3(20)        | 9(60)        | 3             |
| <i>P53</i>      | 2(4)         | 38(76)       | 10            | 4(27)        | 9(60)        | 2             |
| <i>FAM46C</i>   | 3(6)         | 36(72)       | 11            | 0            | 13(87)       | 2             |

**Supplementary Table S2.** Highly expressed lncRNAs displaying an average log<sub>2</sub> expression >10.

| Log <sub>2</sub> expression >10 | chromosome |
|---------------------------------|------------|
| <b>LINC01001</b>                | 11p15      |
| <b>NEAT1</b>                    | 11q13      |
| <b>MALAT1</b>                   | 11q13      |
| <b>RP11-658F2.8</b>             | 11q13      |
| <b>RP11-736K20.5</b>            | 11q14      |
| <b>LINC01089</b>                | 12q24      |
| <b>LRRC75A-AS1-014</b>          | 17p11      |
| <b>LINC01480</b>                | 19q13      |
| <b>RP11-161I10.1</b>            | 1q31       |
| <b>TUG1</b>                     | 22q12      |
| <b>AC074289.1</b>               | 2p14       |
| <b>FGD5-AS1</b>                 | 3p25       |
| <b>RP11-325F22.2</b>            | 7q22       |
| <b>LINC-PINT</b>                | 7q32       |
| <b>EBLN3</b>                    | 9p13       |
| <b>FTX</b>                      | Xq13       |
| <b>CDR1-AS</b>                  | Xq27       |

**Supplementary Table S3.** Sequences of the primers used for qRT-PCR.

| <b>PRIMER</b>           | <b>Sequence 5' - 3'</b> |
|-------------------------|-------------------------|
| NEAT1 5'-region Forward | GCCTTGTAGATGGAGCTTGC    |
| NEAT1 5'-region Reverse | GCACAACACAATGACACCCT    |
| NEAT1 3'-region Forward | GGCCAGAGCTTTGTTGCTTC    |
| NEAT1 3'-region Reverse | GGTGCGGGCACTTACTTACT    |

**Supplementary Table S4.** Modulated genes resulting from SAM (Significant Analysis of Microarray algorithm) analyses (<https://github.com/MikeJSeo/SAM>) comparing MM patients expressing high NEAT1 levels (IV quartile) and low NEAT1 levels (I quartile), ordered based on (d)-score. <sup>8</sup>

| Gene Name | Score(d) | Fold Change |
|-----------|----------|-------------|
| TEX14     | 4.84     | 5.64        |
| LCA5      | 4.72     | 2.54        |
| LRRC39    | 4.71     | 3.57        |
| TRAF6     | 4.61     | 1.94        |
| FAM160B1  | 4.58     | 2.26        |
| BAG3      | 4.55     | 2.35        |
| RIPK1     | 4.54     | 1.94        |
| CRABP2    | 4.45     | 1.89        |
| PIK3C2B   | 4.43     | 1.82        |
| ARID5B    | 4.34     | 3.13        |
| TBC1D15   | 4.28     | 2.00        |
| FBXL3     | 4.19     | 2.17        |
| SLC39A1   | 4.19     | 1.46        |
| ATP13A3   | 4.16     | 1.91        |
| UBE2B     | 4.14     | 1.84        |
| MAD2L2    | 4.09     | 1.64        |
| DYRK1A    | 4.09     | 2.33        |
| GORAB     | 4.02     | 1.96        |
| ZNF460    | 4.00     | 1.72        |
| C16orf72  | 3.98     | 1.61        |
| WDR26     | 3.97     | 2.30        |
| DCAF8     | 3.96     | 1.89        |
| CASP7     | 3.94     | 1.95        |
| SMYD4     | -5.57    | 0.49        |
| WDR70     | -5.04    | 0.58        |
| NEMP1     | -4.92    | 0.54        |
| CCR2      | -4.90    | 0.18        |
| CCDC77    | -4.90    | 0.53        |
| DUSP19    | -4.71    | 0.33        |
| GTF2H2C   | -4.66    | 0.55        |
| RCCD1     | -4.60    | 0.67        |
| SNUPN     | -4.59    | 0.47        |
| CBX1      | -4.56    | 0.48        |
| POLH      | -4.51    | 0.36        |
| ALDH5A1   | -4.38    | 0.43        |
| SPATA5    | -4.29    | 0.62        |
| ELMO1     | -4.28    | 0.58        |
| EVI2A     | -4.28    | 0.37        |
| USP28     | -4.27    | 0.46        |
| SENP8     | -4.25    | 0.68        |
| CEP78     | -4.24    | 0.54        |

|          |       |      |
|----------|-------|------|
| INIP     | -4.23 | 0.55 |
| NAPEPLD  | -4.22 | 0.45 |
| POC5     | -4.21 | 0.50 |
| RNASEH2A | -4.18 | 0.55 |
| ASXL2    | -4.17 | 0.48 |
| METTL7A  | -4.17 | 0.47 |
| NCAPD2   | -4.16 | 0.50 |
| ELOF1    | -4.15 | 0.55 |
| DAXX     | -4.15 | 0.57 |
| ERMP1    | -4.14 | 0.54 |
| DNMT1    | -4.14 | 0.41 |
| RASA1    | -4.13 | 0.60 |
| CKAP5    | -4.12 | 0.54 |
| CLINT1   | -4.10 | 0.64 |
| APEH     | -4.09 | 0.59 |
| BTK      | -4.09 | 0.38 |
| ZNF260   | -4.06 | 0.30 |
| HACD3    | -4.05 | 0.47 |
| NFYA     | -4.02 | 0.60 |
| GEMIN4   | -4.01 | 0.64 |
| ASF1B    | -3.99 | 0.44 |
| EHBP1    | -3.98 | 0.50 |
| PPP5C    | -3.98 | 0.47 |
| SKA2     | -3.98 | 0.44 |
| DROSHA   | -3.97 | 0.61 |
| MRPL34   | -3.97 | 0.46 |
| IRF2     | -3.94 | 0.49 |
| DFFB     | -3.94 | 0.61 |
| SCAI     | -3.94 | 0.52 |
| MUM1     | -3.93 | 0.59 |
| TAS2R5   | -3.92 | 0.65 |
| SLC38A9  | -3.90 | 0.55 |
| DPF2     | -3.89 | 0.55 |
| CCR3     | -3.89 | 0.63 |
| RSBN1L   | -3.87 | 0.57 |
| TBC1D5   | -3.87 | 0.57 |
| DBP      | -3.85 | 0.56 |
| ST3GAL5  | -3.83 | 0.43 |
| SLC25A40 | -3.82 | 0.53 |
| UCP2     | -3.81 | 0.50 |
| RAD51C   | -3.80 | 0.49 |
| THYN1    | -3.79 | 0.51 |
| HN1L     | -3.79 | 0.57 |
| BAG2     | -3.79 | 0.51 |
| TTLL11   | -3.75 | 0.44 |
| LARS     | -3.75 | 0.48 |
| GRHPR    | -3.74 | 0.57 |

|          |       |      |
|----------|-------|------|
| TAS2R4   | -3.73 | 0.66 |
| DYNLL1   | -3.72 | 0.41 |
| MOCS2    | -3.71 | 0.48 |
| TYSND1   | -3.71 | 0.69 |
| BCS1L    | -3.70 | 0.48 |
| TUBB     | -3.70 | 0.67 |
| ABCG2    | -3.69 | 0.21 |
| ZNF718   | -3.69 | 0.57 |
| TMEM245  | -3.68 | 0.64 |
| ADRB2    | -3.67 | 0.50 |
| SKP2     | -3.67 | 0.46 |
| GCDH     | -3.66 | 0.64 |
| GATC     | -3.66 | 0.56 |
| KANK1    | -3.65 | 0.37 |
| RHOT1    | -3.65 | 0.53 |
| DDX10    | -3.65 | 0.53 |
| RACGAP1  | -3.65 | 0.45 |
| FARSA    | -3.64 | 0.55 |
| RNF145   | -3.64 | 0.55 |
| OSGEPL1  | -3.64 | 0.48 |
| CWC27    | -3.63 | 0.65 |
| ARHGEF3  | -3.62 | 0.52 |
| ODF2     | -3.59 | 0.63 |
| EXOSC2   | -3.58 | 0.54 |
| DPY30    | -3.58 | 0.53 |
| C9orf114 | -3.57 | 0.52 |
| TLR10    | -3.56 | 0.40 |
| CHST12   | -3.56 | 0.54 |
| TBCK     | -3.55 | 0.63 |
| TOR1B    | -3.54 | 0.60 |
| TUBGCP4  | -3.53 | 0.52 |
| RBM4B    | -3.52 | 0.63 |
| POLR3K   | -3.52 | 0.46 |
| KYAT1    | -3.52 | 0.72 |
| NEURL4   | -3.52 | 0.55 |
| PCDHGB6  | -3.52 | 0.45 |
| DOCK8    | -3.52 | 0.58 |
| HMMR     | -3.50 | 0.48 |
| DCAF7    | -3.48 | 0.62 |
| CNNM2    | -3.47 | 0.60 |
| MRM2     | -3.47 | 0.71 |
| DNAJA3   | -3.46 | 0.54 |
| PREB     | -3.46 | 0.46 |
| TMEM138  | -3.45 | 0.56 |
| ATP6V0E1 | -3.45 | 0.65 |
| C1orf186 | -3.44 | 0.19 |
| HIKESHI  | -3.43 | 0.57 |



|        |       |      |
|--------|-------|------|
| MRPL17 | -3.43 | 0.58 |
| HSH2D  | -3.43 | 0.49 |
| ADAM22 | -3.43 | 0.37 |

---

**Supplementary Table S5.** List of the significantly enriched Gene sets for the 138 differentially expressed genes, by ToppGene suite analysis. *Q*-value calculated according to Benjamini&Hochberg correction.

| Category                          | Source                                   | ID                    | Name                                                                                                                                                   | <i>q</i> -value | Hit Count in Query List | Hit Count in Genome | Hit in Query List                                                                                                                                                                                              |
|-----------------------------------|------------------------------------------|-----------------------|--------------------------------------------------------------------------------------------------------------------------------------------------------|-----------------|-------------------------|---------------------|----------------------------------------------------------------------------------------------------------------------------------------------------------------------------------------------------------------|
| Drug                              | CTD                                      | ctd:D003375           | Coumestrol                                                                                                                                             | 3.26E-04        | 32                      | 1796                | RAD51C,MRM2,NEMP1,ATP6V0E1,RASA1,RNASEH2A,RCCD1,DOCK8,BAG3,BAG2,CKAP5,CASP7,SKA2,HMMR,TUBGCP4,SKP2,BCS1L,EXOSC2,TUBB2A,ZNF260,UBE2B,PPP5C,CEP78,ZNF718,ASF1B,NCAPD2,GE MIN4,RACGAP1,MAD2L2,METTL7A,RHOT1,DNMT1 |
| Interaction                       |                                          | int:DYNLL1            | DYNLL1 interactions                                                                                                                                    | 6.88E-04        | 12                      | 224                 | LCA5,POLH,DYRK1A,HMMR,CCDC77,RHEX,KANK1,ASF1B,DYNLL1,CLINT1,DNMT1,DCAF7                                                                                                                                        |
| Coexpression                      | GeneSigDB                                | 18757322-TableS1      | Human Breast_Creighton08_2154genes                                                                                                                     | 1.74E-03        | 29                      | 1739                | RAD51C,MRM2,NEMP1,POLR3K,TBC1D15,RNASEH2A,TBC1D5,BAG3,WDR70,APEH,HMMR,DBP,CRABP2,BCS1L,EXOSC2,TUBB2A,FARSA,KANK1,PPP5C,ASF1B,OSGEPL1,UCP2,ARID5B,NCAPD2,RACGAP1,CHS T12,ALDH5A1,METTL7A,DNMT1                  |
| Coexpression                      | MSigDB C2: CGP Curated Gene Sets (v6.0)  | M80                   | Genes up-regulated in TC71 and EWS502 cells (Ewing's sarcoma) by EWSR1-FLI1 [GeneID=2130;2314] as inferred from RNAi knockdown of this fusion protein. | 1.74E-03        | 24                      | 1276                | RAD51C,MRM2,NEMP1,RNASEH2A,HACD3,BAG2,LARS,CKAP5,SKA2,HMMR,TUBGCP4,SKP2,EXOSC2,SMYD4,PPP5C,CEP78,ASF1B,TMEM245,NCAPD2,NFYA,GEMIN4,RACGAP1,POC5,DNMT1                                                           |
| Coexpression                      | MSigDB C2: CGP Curated Gene Sets (v6.0)  | M10351                | Genes down-regulated in T24 (bladder cancer) cells in response to the photodynamic therapy (PDT) stress.                                               | 2.94E-03        | 16                      | 637                 | RAD51C,POLR3K,DCAF8,GATC,ERMP1,SKP2,BCS1L,DFFB,FARSA,KANK1,ADRB2,THYN1,UCP2,GEMIN4,MRPL34,ALDH5A1                                                                                                              |
| Coexpression                      | MSigDB C2: CGP Curated Gene Sets (v6.0)  | M14427                | Genes down-regulated in nasopharyngeal carcinoma (NPC) compared to the normal tissue.                                                                  | 2.94E-03        | 24                      | 1367                | RAD51C,MRM2,NEMP1,NAPEPLD,RNASEH2A,HACD3,RCCD1,LARS,CKAP5,HMMR,TUBGCP4,CCDC77,SKP2,ADAM22,ZNF260,DNAJA3,CEP78,SLC25A40,OSGEPL1,GORAB,CBX1,RACGAP1,RHOT1,SCAI                                                   |
| Transcription Factor Binding Site |                                          | RCGCANGCGY V\$NRF1_Q6 | RCGCANGCGY_V\$NRF1_Q6                                                                                                                                  | 3.11E-03        | 17                      | 654                 | TBC1D15,RASA1,TBC1D5,POLH,DPF2,HMMR,TUBGCP4,EXOSC2,PRES,MRPL17,DNAJA3,DFFB,DPY30,NFYA,GEMIN4,MOCS2,DNMT1                                                                                                       |
| Coexpression                      | MSigDB C7: Immunologic Signatures (v6.0) | M5300                 | Genes down-regulated in comparison of untreated CD4 [GeneID=920] memory T cells from old donors versus those treated with TSST at 40 h.                | 3.51E-03        | 9                       | 200                 | RAD51C,POLR3K,RNASEH2A,RBM4B,CKAP5,IRF4,SNUPN,HMMR,RACGAP1                                                                                                                                                     |
| Coexpression                      | MSigDB C7: Immunologic Signatures (v6.0) | M8271                 | Genes down-regulated in B lymphocytes stimulated by anti-IgM: 3h versus 16h.                                                                           | 3.51E-03        | 9                       | 200                 | EHBP1,LRRC39,NAPEPLD,RNASEH2A,DOCK8,WDR70,DROSHA,SPATA5,RHOT1                                                                                                                                                  |
| Coexpression                      | GeneSigDB                                | 17952126-SuppTable2   | Human Bladder_Buytaert08_651genes                                                                                                                      | 3.51E-03        | 15                      | 608                 | RAD51C,POLR3K,DCAF8,ERMP1,SKP2,BCS1L,DFFB,FARSA,KANK1,ADRB2,THYN1,UCP2,GEMIN4,MRPL34,ALDH5A1                                                                                                                   |
| Coexpression                      | GeneSigDB                                | 18362358-Table11      | Human Leukemia_Calln08_60genes                                                                                                                         | 3.70E-03        | 5                       | 41                  | RAD51C,LARS,OSGEPL1,ASXL2,RHOT1                                                                                                                                                                                |
| Coexpression                      | MSigDB H: Hallmark Gene Sets (v6.0)      | M5922                 | Genes up-regulated during unfolded protein response, a cellular stress response related to the endoplasmic reticulum.                                  | 3.81E-03        | 7                       | 113                 | BAG3,EXOSC2,TUBB2A,DDX10,PRES,NFYA,GEMIN4                                                                                                                                                                      |
| Coexpression                      | MSigDB C2: CGP Curated Gene Sets (v6.0)  | M1105                 | Genes down-regulated in ME-A cells (breast cancer) undergoing apoptosis in response to doxorubicin [PubChem=31703].                                    | 3.81E-03        | 27                      | 1781                | RAD51C,TRAF6,DCAF8,RIPK1,RCCD1,HIKESHI,CKAP5,DYRK1A,DUSP19,TUBGCP4,SKP2,BCS1L,EXOSC2,ELMO1,DDX10,MRPL17,ST3GAL5,DPY30,NCAPD2,NFYA,CBX1,RACGAP1,ATP13A3,MRPL34,MAD2L2,RNF145,NEURL4                             |

|                    |                                          |                                           |                                                                                                                                                                                                                     |          |    |      |                                                                                                                                                                                              |
|--------------------|------------------------------------------|-------------------------------------------|---------------------------------------------------------------------------------------------------------------------------------------------------------------------------------------------------------------------|----------|----|------|----------------------------------------------------------------------------------------------------------------------------------------------------------------------------------------------|
| Coexpression       | MSigDB C2: CGP Curated Gene Sets (v6.0)  | M1463                                     | Genes up-regulated in Caco-2 cells (intestinal epithelium) after coculture with the probiotic bacteria <i>L. casei</i> for 24h.                                                                                     | 3.81E-03 | 14 | 556  | NEMP1,POLR3K,ATP6V0E1,HMMR,SKP2,EXOSC2,TU<br>BB2A,THYN1,DROSHA,GEMIN4,RACGAP1,DYNLL1,<br>ATP13A3,DNMT1                                                                                       |
| Coexpression Atlas | FaceBase_RNAseq                          | Facebase_RNAs eq_e8.5_Floor Plate_2500_K3 | FacebaseRNAseq_e8.5_Floor Plate_top-relative-expression-ranked_2500_k-means-cluster#3                                                                                                                               | 3.94E-03 | 17 | 708  | ATP6V0E1,BAG3,BAG2,LARS,TMEM138,APEH,DUSP<br>19,TYSND1,SKP2,WDR26,DNAJA3,FARSA,PPP5C,CEP<br>78,ASF1B,NFYA,GEMIN4                                                                             |
| Coexpression Atlas | PCBC                                     | ratio_ECTO_vs_SC_2500_K2                  | ratio_induced-Ectoderm_vs_StemCell_top-relative-expression-ranked_2500_k-means-cluster#2                                                                                                                            | 3.94E-03 | 13 | 419  | MRM2,POLR3K,DCAF8,SPOUT1,HACD3,HIKESHI,LA<br>RS,TMEM138,TUBGCP4,THYN1,DROSHA,GEMIN4,R<br>ACGAP1                                                                                              |
| Coexpression       | MSigDB C2: CGP Curated Gene Sets (v6.0)  | M2368                                     | Genes up-regulated during later stage of differentiation of Oli-Neu cells (oligodendroglial precursor) in response to PD174265 [PubChem=4709].                                                                      | 4.43E-03 | 14 | 570  | NEMP1,CKAP5,CASP7,SKA2,HMMR,CCDC77,SKP2,T<br>HYN1,ASF1B,NCAPD2,RACGAP1,DYNLL1,DNMT1,D<br>CAF7                                                                                                |
| Coexpression       | MSigDB C2: CGP Curated Gene Sets (v6.0)  | M9516                                     | Genes constituting the BRCA2-PCC network of transcripts whose expression positively correlated (Pearson correlation coefficient, PCC >= 0.4) with that of BRCA2 [GeneID=675] across a compendium of normal tissues. | 4.43E-03 | 12 | 423  | RAD51C,NEMP1,RNASEH2A,CKAP5,HMMR,SKP2,EX<br>OSC2,NCAPD2,NFYA,CBX1,CLINT1,DNMT1                                                                                                               |
| Coexpression       | GeneSigDB                                | 17229949-TableS4                          | Human Breast_Liu07_186genes                                                                                                                                                                                         | 4.43E-03 | 8  | 172  | SLC38A9,LARS,DPF2,FAM160B1,GORAB,ATP13A3,M<br>ETTL7A,DCAF7                                                                                                                                   |
| Coexpression       | GeneSigDB                                | 16597596-TableS2-3                        | Human Leukemia_Wilson06_50genes_DifferentialClusterC                                                                                                                                                                | 4.84E-03 | 5  | 49   | GCDH,BCS1L,EXOSC2,DYNLL1,DCAF7                                                                                                                                                               |
| Coexpression       | MSigDB C2: CGP Curated Gene Sets (v6.0)  | M2228                                     | Genes down-regulated in erythroid progenitor cells from fetal livers of E13.5 embryos with KLF1 [GeneID=10661] knockout compared to those from the wild type embryos.                                               | 5.38E-03 | 28 | 1972 | POLR3K,RIPK1,DOCK8,HIKESHI,POLH,CASP7,EVI2A<br>,SKA2,TUBGCP4,FAM160B1,SKP2,ELOF1,ELMO1,INI<br>P,CCR2,UBE2B,THYN1,PPP5C,DPY30,BTK,NFYA,RA<br>CGAP1,TOR1B,RNF145,SPATA5,CRAMP1,RHOT1,DN<br>MT1 |
| Coexpression       | GeneSigDB                                | 18387200-Genes                            | Human Breast_Mutarelli08_1488genes                                                                                                                                                                                  | 6.36E-03 | 20 | 1169 | RAD51C,POLR3K,RNASEH2A,POLH,LARS,CKAP5,H<br>MMR,TUBGCP4,CRABP2,SKP2,BCS1L,EXOSC2,DDX<br>10,MRPL17,FARSA,ASF1B,NCAPD2,GEMIN4,RACGA<br>P1,MAD2L2                                               |
| Coexpression       | MSigDB C2: CGP Curated Gene Sets (v6.0)  | M18120                                    | Genes down-regulated in HCT116 cells (colon cancer) by expression of MIR192 or MIR215 [GeneID=406967;406997] at 24 h.                                                                                               | 6.36E-03 | 17 | 893  | NEMP1,SLC39A1,HACD3,LARS,DYRK1A,CASP7,ER<br>MP1,HMMR,INIP,CEP78,SLC25A40,NFYA,RACGAP1,<br>CHST12,TOR1B,ALDH5A1,RSBN1L                                                                        |
| Coexpression       | MSigDB C2: CGP Curated Gene Sets (v6.0)  | M2156                                     | Genes up-regulated in MCF7 cells (breast cancer) at 24 h of estradiol [PubChem=5757] treatment.                                                                                                                     | 6.36E-03 | 10 | 324  | NEMP1,RNASEH2A,SKP2,EXOSC2,DDX10,CEP78,AS<br>F1B,NCAPD2,RACGAP1,DNMT1                                                                                                                        |
| Coexpression       | MSigDB C7: Immunologic Signatures (v6.0) | M3594                                     | Genes down-regulated in comparison of CD8 T cells at 0 h versus those at 24 h after stimulation with antigen-B7-1.                                                                                                  | 6.36E-03 | 8  | 200  | POLR3K,CKAP5,IRF4,ELOF1,MRPL17,CBX1,RHOT1,<br>DNMT1                                                                                                                                          |
| Coexpression       | MSigDB C7: Immunologic Signatures (v6.0) | M4248                                     | Genes down-regulated in comparison of CD4 [GeneID=920] T cells treated with IL4 [GeneID=3565] and anti-IL12 at 1.5 h versus those at 72 h.                                                                          | 6.36E-03 | 8  | 200  | RAD51C,POLR3K,RCCD1,IRF2,THYN1,GRHPR,ASF1<br>B,MAD2L2                                                                                                                                        |
| Coexpression       | MSigDB C7: Immunologic Signatures (v6.0) | M3830                                     | Genes up-regulated in comparison of dendritic cells (DC) stimulated with poly(I:C) (TLR3 agonist) at 2 h versus DC cells stimulated with Pam3Csk4 (TLR1/2 agonist) at 2 h.                                          | 6.36E-03 | 8  | 200  | RASA1,GATC,EVI2A,SKP2,DNAJA3,CHST12,SPATA5,<br>DNMT1                                                                                                                                         |
| Coexpression       | MSigDB C7: Immunologic Signatures (v6.0) | M8103                                     | Genes up-regulated in unstimulated IL10 [GeneID=3586] knockout macrophages versus NFKB1 and IL10 [GeneID=4790;3586] knockout macrophages stimulated by LPS.                                                         | 6.36E-03 | 8  | 200  | RASA1,APEH,EVI2A,SKA2,DPF2,CCDC77,RACGAP1,<br>HSH2D                                                                                                                                          |
| Coexpression       | MSigDB C7: Immunologic Signatures (v6.0) | M5303                                     | Genes down-regulated in comparison of untreated CD4 [GeneID=920] memory T cells from old donors versus those treated with TSST at 72 h.                                                                             | 6.36E-03 | 8  | 200  | RAD51C,RNASEH2A,RBM4B,CKAP5,IRF4,SNUPN,H<br>MMR,RACGAP1                                                                                                                                      |

|              |                                          |                   |                                                                                                                                                                                                                     |          |    |      |                                                                                                                                                          |
|--------------|------------------------------------------|-------------------|---------------------------------------------------------------------------------------------------------------------------------------------------------------------------------------------------------------------|----------|----|------|----------------------------------------------------------------------------------------------------------------------------------------------------------|
| Coexpression | MSigDB C7: Immunologic Signatures (v6.0) | M3326             | Genes up-regulated in comparison of polysome bound (translated) mRNA versus total mRNA in dendritic cells.                                                                                                          | 6.36E-03 | 8  | 200  | SPOUT1,BAG3,BCS1L,DNAJA3,GORAB,RACGAP1,ARHGFE3,CRAMP1                                                                                                    |
| Coexpression | MSigDB C7: Immunologic Signatures (v6.0) | M3591             | Genes down-regulated in comparison of CD8 T cells at 0 h versus those at 24 h after stimulation with IL12 .                                                                                                         | 6.36E-03 | 8  | 200  | POLR3K,CKAP5,IRF4,CRABP2,ELOF1,MRPL17,NEURL4,RHOT1                                                                                                       |
| Coexpression | MSigDB C7: Immunologic Signatures (v6.0) | M4298             | Genes down-regulated in comparison of naive CD8 T cells versus effector CD8 IL2RA [GeneID=3559] low T cells at.                                                                                                     | 6.36E-03 | 8  | 200  | RAD51C,NAPEPLD,HIKESHI,DUSP19,ERMP1,INIP,DR OSHA,CHST12                                                                                                  |
| Coexpression | MSigDB C7: Immunologic Signatures (v6.0) | M9922             | Genes up-regulated in B lymphocytes: untreated versus anti-IgM for 6h.                                                                                                                                              | 6.36E-03 | 8  | 200  | EHBP1,TBC1D5,CKAP5,ELMO1,SLC25A40,UCP2,RHOT1,DNMT1                                                                                                       |
| Coexpression | MSigDB C7: Immunologic Signatures (v6.0) | M6925             | Genes up-regulated in B lymphocytes: control versus anti IgM and CpG oligodeoxynucleotide 1826.                                                                                                                     | 6.36E-03 | 8  | 200  | RNASEH2A,HIKESHI,DUSP19,HMMR,ZNF260,GRHPR,CHST12,METTL7A                                                                                                 |
| Coexpression | GeneSigDB                                | 17150101-TableS11 | Human Breast_Troester06_436genes-up-DOX-ZR75-1                                                                                                                                                                      | 6.52E-03 | 10 | 329  | RNASEH2A,RCCD1,CASP7,HMMR,SKP2,SLC25A40,ASF1B,NCAPD2,RACGAP1,DNMT1                                                                                       |
| Coexpression | MSigDB C2: CGP Curated Gene Sets (v6.0)  | M1744             | Genes with promoters bound by E2F4 [GeneID=1874] in unstimulated hybridoma cells.                                                                                                                                   | 6.53E-03 | 15 | 727  | NEMP1,HIKESHI,SKA2,HMMR,SKP2,EXOSC2,INIP,ASF1B,DROSHA,NCAPD2,NFYA,CBX1,RACGAP1,DNMT1,DCAF7                                                               |
| Coexpression | MSigDB C2: CGP Curated Gene Sets (v6.0)  | M1195             | Genes up-regulated in hepatocellular carcinoma (HCC) compared to normal liver samples.                                                                                                                              | 8.23E-03 | 15 | 744  | NEMP1,SLC39A1,HACD3,TBC1D5,BAG2,ERMP1,HMMR,TYSND1,SKP2,ELMO1,ASF1B,NCAPD2,NFYA,CBX1,DCAF7                                                                |
| Coexpression | MSigDB C2: CGP Curated Gene Sets (v6.0)  | M5611             | Genes constituting the BRCA1-PCC network of transcripts whose expression positively correlated (Pearson correlation coefficient, PCC >= 0.4) with that of BRCA1 [GeneID=672] across a compendium of normal tissues. | 8.23E-03 | 24 | 1651 | RAD51C,NEMP1,RNASEH2A,CKAP5,CASP7,IRF2,IRF4,DAXX,HMMR,SKP2,ADAM22,KYAT1,DDX10,FARSA,BTK,UCP2,NCAPD2,GEMIN4,ATP13A3,CLINT1,ABCG2,ALDH5A1,DNMT1,DCAF7      |
| Coexpression | GeneSigDB                                | 19139136-TableS3  | Human Prostate_John-Aryankalayil09_2212genes                                                                                                                                                                        | 8.23E-03 | 23 | 1547 | NEMP1,RCCD1,ZNF460,POLH,SKA2,DUSP19,HMMR,CCDC77,CRABP2,SKP2,KYAT1,SLC25A40,ST3GAL5,PIK3C2B,ASF1B,OSGEPL1,TLL11,GORAB,ARID5B,NCAPD2,RACGAP1,CLINT1,RNF145 |
| Coexpression | MSigDB C2: CGP Curated Gene Sets (v6.0)  | M4077             | Genes identified by method 2 as coordinately down-regulated late in HMEC cells (mammary epithelium) during acinar development in vitro.                                                                             | 8.23E-03 | 9  | 277  | RNASEH2A,HACD3,CKAP5,SKP2,BCS1L,PREB,MRPL17,DROSHA,RACGAP1                                                                                               |
| Coexpression | MSigDB C2: CGP Curated Gene Sets (v6.0)  | M1915             | Genes down-regulated in neural stem cells (NSC) at 60 h after cre-lox knockout of TLX (NR2E1) [GeneID=7101].                                                                                                        | 8.23E-03 | 9  | 277  | RAD51C,POLR3K,HMMR,SKP2,EXOSC2,ASF1B,NCAPD2,RACGAP1,DNMT1                                                                                                |

**Supplementary Table S6.** Reactome gene sets obtained using Gene Sets Enrichment Analysis showing significant modulation between patients with low and high NEAT1 expression level. NES: Normalized Enrichment Score. Pathways in bold were found significantly enriched also in GSEA analysis run in GSE2658 series.

| Gene set name                                                                   | Gene set size | NES   | p-value | Gene List                                                                                                                                                                                                                                                                                                                                                                                                                                                                                                                                                                                                                                                                                                                                                                                                                                                                                         |
|---------------------------------------------------------------------------------|---------------|-------|---------|---------------------------------------------------------------------------------------------------------------------------------------------------------------------------------------------------------------------------------------------------------------------------------------------------------------------------------------------------------------------------------------------------------------------------------------------------------------------------------------------------------------------------------------------------------------------------------------------------------------------------------------------------------------------------------------------------------------------------------------------------------------------------------------------------------------------------------------------------------------------------------------------------|
| <b>PI3K AKT ACTIVATION</b>                                                      | 36            | 1.53  | 0.028   | AKT3, PIK3CA, PHLPP1, IRS1, IRS2, CDKN1A, CHUK, NR4A1, CDKN1B, RICTOR, FOXO1, TRIB3, NTRK1, MDM2, AKT1, RHOA, CASP9, PIK3R1, FOXO4, NGF, MLST8, CREB1, BAD, PDPK1, MTOR, FOXO3, RPS6KB2, AKT2, PIK3CB, GSK3A, TSC2, MAPKAP1, AKT1S1, THEM4, PIK3R2, PTEN                                                                                                                                                                                                                                                                                                                                                                                                                                                                                                                                                                                                                                          |
| AMINO ACID TRANSPORT ACROSS THE PLASMA MEMBRANE                                 | 31            | 1.51  | 0.043   | SLC7A5, SLC3A1, SLC7A1, SLC6A15, SLC7A11, SLC43A2, SLC3A2, SLC6A6, SLC7A8, SLC7A10, SLC6A12, SLC38A5, SLC7A9, SLC36A2, SLC7A3, SLC6A14, SLC7A2, SLC16A10, SLC38A2, SLC7A6, SLC7A7, SLC6A19, SLC38A1, SLC38A3, SLC43A1, SLC6A18, SLC1A5, SLC36A1, SLC38A4, SLC1A4, SLC6A20                                                                                                                                                                                                                                                                                                                                                                                                                                                                                                                                                                                                                         |
| SIGNAL TRANSDUCTION BY L1                                                       | 34            | 1.47  | 0.033   | ITGA2B, ITGB3, ITGAV, RPS6KA2, RPS6KA6, RPS6KA4, EGFR, ITGB1, MAP2K1, RPS6KA5, RPS6KA3, FGFR1, CSNK2B, CSNK2A2, RAC1, NCAM1, CLTC, ITGA5, MAP2K2, CSNK2A1, NRP1, ITGA9, AP2A1, RPS6KA1, PAK1, AP2B1, MAPK1, MAPK3, CLTA, AP2A2, SH3GL2, AP2S1, AP2M1, L1CAM                                                                                                                                                                                                                                                                                                                                                                                                                                                                                                                                                                                                                                       |
| DIABETES PATHWAYS                                                               | 122           | 1.40  | 0.042   | ATF3, DDIT3, DNAJB9, DIS3, GH1, GHRL, ARFGAP1, LMNA, CCL2, RAB27A, SHC1, EXOC8, ATF6, CTDSP2, DNAJC3, TSPYL2, KLF4, EXOC1, EIF2AK3, DNAJB11, MMP1, SLC30A7, ERN1, FKBP14, SERP1, KDELR3, ACADVL, LEP, STX1A, PAPA2, EDEM1, VAMP2, IGF2, PDIA5, HDGF, SEC11C, TPP1, PLA2G7, EXOSC7, KIF5B, HERPUD1, ATF4, PCSK2, MBTPS1, IGFBP5, ZBTB17, MBTPS2, IGFBP1, EXOSC1, HSPA5, MBOAT4, GCG, SPCS1, SPCS2, SSR1, HSP90B1, SPCS3, EXOC3, SRPRB, PLG, IGF2BP3, PAPA, EXOC2, IGFBP3, F2, NFYB, EXOSC9, KLK3, PDIA6, IGFBP6, MMP2, WIP1, IGFBP4, EIF2S1, ADD1, IGFALS, EXOC4, EXOC5, SYVN1, ATP6V0D1, IGFBP2, EXOSC8, PCSK1, KHSRP, GOSR2, CALR, EXOSC6, DDX11, CXXC1, SEC11A, HYOU1, IGF2BP1, INS, SEC31A, GSK3A, CUL7, BCHE, PARN, CPE, YIF1A, XBP1, DCTN1, PPP2R5B, TATDN2, TLN1, ASNS, IGF2BP2, KLHDC3, MYO5A, EXOC6, EXTL3, WFS1, CTSG, SLC30A5, EXOSC4, NFYA, DCP2, EXOSC3, EXOSC2, EXOSC5, PREB, SNAP25 |
| PROCESSIVE SYNTHESIS ON THE LAGGING STRAND                                      | 15            | -1.69 | 0.000   | FEN1, DNA2, LIG1, RPA2, POLD1, POLA1, POLD2, POLD4, POLD3, PRIM2, RPA3, POLA2, RPA1, PRIM1, PCNA                                                                                                                                                                                                                                                                                                                                                                                                                                                                                                                                                                                                                                                                                                                                                                                                  |
| FORMATION OF INCISION COMPLEX IN GG NER                                         | 20            | -1.69 | 0.024   | GTF2H4, RAD23B, CDK7, ERCC5, XPA, ERCC4, XPC, DDB1, CCNH, ERCC3, GTF2H3, ERCC1, RPA2, ERCC2, RPA3, GTF2H1, MNAT1, DDB2, RPA1, GTF2H2                                                                                                                                                                                                                                                                                                                                                                                                                                                                                                                                                                                                                                                                                                                                                              |
| <b>DESTABILIZATION OF MRNA BY KSRP</b>                                          | 16            | -1.63 | 0.020   | DIS3, EXOSC7, EXOSC1, EXOSC9, AKT1, MAPK14, EXOSC8, KHSRP, EXOSC6, PARN, MAPK11, EXOSC4, DCP2, EXOSC3, EXOSC2, EXOSC5                                                                                                                                                                                                                                                                                                                                                                                                                                                                                                                                                                                                                                                                                                                                                                             |
| GLOBAL GENOMIC NER GG NER                                                       | 32            | -1.61 | 0.018   | GTF2H4, RFC5, RAD23B, CDK7, ERCC5, XPA, ERCC4, XPC, DDB1, CCNH, ERCC3, GTF2H3, RFC3, RFC2, ERCC1, LIG1, RPA2, ERCC2, POLD1, POLD2, POLE, POLD4, POLD3, RPA3, GTF2H1, MNAT1, RFC4, DDB2, POLE2, RPA1, PCNA, GTF2H2                                                                                                                                                                                                                                                                                                                                                                                                                                                                                                                                                                                                                                                                                 |
| HOMOLOGOUS RECOMBINATION REPAIR OF REPLICATION INDEPENDENT DOUBLE STRAND BREAKS | 16            | -1.60 | 0.020   | BRCA2, TP53BP1, MDC1, RAD50, RAD51, LIG1, NBN, RPA2, ATM, H2AFX, RAD52, MRE11A, RPA3, RPA1, BRCA1, BRIP1                                                                                                                                                                                                                                                                                                                                                                                                                                                                                                                                                                                                                                                                                                                                                                                          |
| RESOLUTION OF AP SITES VIA THE MULTIPLE NUCLEOTIDE PATCH REPLACEMENT PATHWAY    | 17            | -1.57 | 0.042   | MPG, TDG, MBD4, FEN1, NTHL1, CCNO, POLB, MUTYH, APEX1, LIG1, POLD1, POLD2, OGG1, POLD4, POLD3, SMUG1, PCNA                                                                                                                                                                                                                                                                                                                                                                                                                                                                                                                                                                                                                                                                                                                                                                                        |
| METABOLISM OF NUCLEOTIDES                                                       | 69            | -1.57 | 0.010   | AK5, PNP, ADSS, NT5E, UPB1, GUK1, NT5C2, UPP1, NT5C1B, NT5C1A, TXN, GLRX, AMPD1, UCK2, ADSSL1, TK2, AMPD2, CMPK1, ADK, HPRT1, GSR, IMPDH1, DPYD, UPP2, DCTD, UMPS, AMPD3, GDA, APRT, PFAS, TXNRD1, AK1, DUT, NT5C, AGXT2, ADAL, GMPR, DGUOK, ADSL, GMPS, UCK1, GMPR2, TYMP, CAT, NT5M, RRM1, DPYS, NME1, IMPDH2, ADA, AK2, ATIC, XDH, NME4, CTPS2, DHODH, PPAT, GART, CDA, RRM2B, TK1, PAICS, GPX1, TYMS, DTYMK, DCK, NME2, CAD, RRM2                                                                                                                                                                                                                                                                                                                                                                                                                                                             |
| BASE EXCISION REPAIR                                                            | 19            | -1.56 | 0.047   | MPG, TDG, MBD4, LIG3, FEN1, NTHL1, CCNO, XRCC1, POLB, MUTYH, APEX1, LIG1, POLD1, POLD2, OGG1, POLD4, POLD3, SMUG1, PCNA                                                                                                                                                                                                                                                                                                                                                                                                                                                                                                                                                                                                                                                                                                                                                                           |

|                                                                       |     |       |       |                                                                                                                                                                                                                                                                                                                                                                                                                                                                                                                                                                                                                                                                                                                                                                                                                                                                  |
|-----------------------------------------------------------------------|-----|-------|-------|------------------------------------------------------------------------------------------------------------------------------------------------------------------------------------------------------------------------------------------------------------------------------------------------------------------------------------------------------------------------------------------------------------------------------------------------------------------------------------------------------------------------------------------------------------------------------------------------------------------------------------------------------------------------------------------------------------------------------------------------------------------------------------------------------------------------------------------------------------------|
| NUCLEOTIDE EXCISION REPAIR                                            | 48  | -1.56 | 0.044 | GTF2H4, TCEA1, RFC5, RAD23B, POLR2A, CDK7, ERCC5, XPA, POLR2B, POLR2D, ERCC4, XAB2, XPC, DDB1, CCNH, POLR2J, POLR2F, ERCC3, POLR2L, POLR2C, POLR2G, GTF2H3, ERCC8, POLR2I, POLR2K, RFC3, RFC2, ERCC6, ERCC1, LIG1, RPA2, ERCC2, POLD1, POLD2, POLE, POLD4, POLD3, POLR2H, POLR2E, RPA3, GTF2H1, MNAT1, RFC4, DDB2, POLE2, RPA1, PCNA, GTF2H2                                                                                                                                                                                                                                                                                                                                                                                                                                                                                                                     |
| KINESINS                                                              | 24  | -1.54 | 0.034 | KIF3B, KLC1, KIF5B, KIFAP3, KIF26A, KIF2B, KIF9, KIF2A, KIF4B, KLC3, KLC2, KIF4A, KLC4, KIF22, KIF3C, KIF5A, KIFC1, KIF2C, KIF18A, KIF11, KIF20A, KIF23, RACGAP1, KIF15                                                                                                                                                                                                                                                                                                                                                                                                                                                                                                                                                                                                                                                                                          |
| EXTENSION OF TELOMERES                                                | 27  | -1.52 | 0.040 | RFC5, FEN1, DNA2, TERT, NHP2, DKC1, RFC3, RFC2, WRAP53, LIG1, RPA2, POLD1, POLA1, POLD2, POLE, POLD4, POLD3, PRIM2, RPA3, RUVBL2, POLA2, RUVBL1, RFC4, POLE2, RPA1, PRIM1, PCNA                                                                                                                                                                                                                                                                                                                                                                                                                                                                                                                                                                                                                                                                                  |
| ACTIVATION OF THE PRE REPLICATIVE COMPLEX                             | 30  | -1.51 | 0.033 | RPA4, CDK2, CDC45, DBF4, MCM4, ORC1, CDT1, ORC5, ORC6, RPA2, ORC3, ORC4, POLA1, POLE, MCM5, CDC7, PRIM2, MCM10, MCM6, RPA3, CDC6, POLA2, MCM2, MCM7, ORC2, MCM8, POLE2, MCM3, RPA1, PRIM1                                                                                                                                                                                                                                                                                                                                                                                                                                                                                                                                                                                                                                                                        |
| LAGGING STRAND SYNTHESIS                                              | 19  | -1.51 | 0.047 | RFC5, FEN1, DNA2, RFC3, RFC2, LIG1, RPA2, POLD1, POLA1, POLD2, POLD4, POLD3, PRIM2, RPA3, POLA2, RFC4, RPA1, PRIM1, PCNA                                                                                                                                                                                                                                                                                                                                                                                                                                                                                                                                                                                                                                                                                                                                         |
| SYNTHESIS AND INTERCONVERSION OF NUCLEOTIDE DI AND TRIPHOSPHATES      | 17  | -1.51 | 0.025 | AK5, GUK1, TXN, GLRX, CMPK1, GSR, TXNRD1, AK1, RRM1, NME1, AK2, NME4, CTSP2, RRM2B, DTYMK, NME2, RRM2                                                                                                                                                                                                                                                                                                                                                                                                                                                                                                                                                                                                                                                                                                                                                            |
| NUCLEOTIDE LIKE PURINERGIC RECEPTORS                                  | 16  | -1.48 | 0.043 | GPR17, LPAR4, P2RY11, ADORA2A, P2RY1, P2RY12, P2RY4, LPAR6, ADORA3, ADORA1, P2RY6, P2RY14, ADORA2B, P2RY10, P2RY2, P2RY13                                                                                                                                                                                                                                                                                                                                                                                                                                                                                                                                                                                                                                                                                                                                        |
| FACTORS INVOLVED IN MEGAKARYOCYTE DEVELOPMENT AND PLATELET PRODUCTION | 117 | -1.46 | 0.042 | HDAC2, MAFK, IRF1, HIST1H3H, GATA3, MFN1, CDC42, EHD1, IFNA16, RAD51B, RAB5A, IFNA21, H3F3B, DOCK1, KIF3B, EP300, MAFG, SIN3A, DOCK6, PRKAR2B, ZFPM2, KLC1, KIF5B, KIFAP3, IFNA5, IFNA10, JMJD1C, MAFF, GATA2, RAC1, MFN2, CAPZA2, IFNB1, CAPZA1, ZFPM1, KIF26A, KIF2B, KIF9, KDM1A, PRKACB, IFNA4, KIF2A, PRKAR1B, DOCK9, AKAP10, WEE1, CABLES2, PRKACG, GATA5, CDK2, IFNA14, EHD2, H3F3A, GATA1, CREBBP, KIF4B, DOCK2, SH2B1, KLC3, ITPK1, IFNA8, GATA6, IFNA2, AK3, IRF7, IFNA6, KLC2, DOCK5, SH2B3, HBG2, GATA4, IFNA7, PRKAR2A, HBE1, PRKACA, VPS45, SH2B2, IFNA17, HBB, NFE2, JAK2, PRKAR1A, KIF4A, KLC4, IRF3, RCOR1, HMG20B, HBD, KIF22, CBX5, ABL1, KIF3C, HDAC1, KIF5A, DOCK3, CDK5, DOCK8, HIST1H3B, CABLES1, KIFC1, KIF2C, MYB, IRF2, AKAP1, HIST1H3E, HIST1H3G, DOCK4, KIF18A, TP53, RAD51C, HIST1H3I, KIF11, KIF20A, KIF23, DOCK10, RACGAP1, KIF15 |
| DARPP 32 EVENTS                                                       | 24  | -1.45 | 0.043 | PPP2CB, PRKAR2B, PPP3CA, PPP2CA, PDE4C, PPP3R1, PDE4B, PRKACB, PDE4D, PRKAR1B, CALM1, PRKACG, CALM2, PPP2R1A, PRKAR2A, PRKACA, PPP1CA, PRKAR1A, CALM3, PPP3CB, PPP1R1B, PPP2R1B, CDK5, PPP2R5D                                                                                                                                                                                                                                                                                                                                                                                                                                                                                                                                                                                                                                                                   |
| CYCLIN A B1 ASSOCIATED EVENTS DURING G2 M TRANSITION                  | 15  | -1.39 | 0.048 | CDK7, CDC25B, CCNH, WEE1, PKMYT1, CCNA1, XPO1, MNAT1, CDC25C, CDC25A, CCNA2, PLK1, CCNB1, CCNB2, CDK1                                                                                                                                                                                                                                                                                                                                                                                                                                                                                                                                                                                                                                                                                                                                                            |

**Supplementary Table S7** lncRNAs significantly under- and overexpressed in NEAT1 quartile IV versus I.

| <b>lncRNA</b>  | <b>ID</b>       | <b>CHR.</b> | <b>Score(d)</b> | <b>Fold Change</b> |
|----------------|-----------------|-------------|-----------------|--------------------|
| NEAT1          | ENSG00000245532 | 11q13       | 9.48            | 1.78               |
| RP11-439L18.1  | ENSG00000232618 | 6q24        | 6.89            | 4.49               |
| MTUS2-AS1      | ENSG00000179141 | 13q12       | 4.51            | 2.05               |
| NARF-IT1       | ENSG00000266236 | 17q25       | 4.47            | 2.24               |
| AC116366.5     | ENSG00000238160 | 5q31        | 4.19            | 1.41               |
| RP11-574F21.2  | ENSG00000228606 | 1q32        | 4.14            | 2.77               |
| MIR22HG        | ENSG00000186594 | 17p13       | 4.11            | 2.83               |
| RP1-90J20.8    | ENSG00000224846 | 6p25        | 4.10            | 2.04               |
| RP11-215P8.3   | ENSG00000248559 | 5q31        | 3.99            | 1.88               |
| RP4-605O3.4    | ENSG00000272368 | 12q13       | 3.96            | 1.73               |
| AC133644.2     | ENSG00000280721 | 2p11        | 3.76            | 3.22               |
| RP11-169E6.1   | ENSG00000261173 | 16q11       | 3.74            | 1.61               |
| C3orf35        | ENSG00000198590 | 3p22        | 3.73            | 1.71               |
| TTLL7-IT1      | ENSG00000233061 | 1p31        | 3.69            | 2.63               |
| RP11-638I2.8   | ENSG00000258666 | 14q32       | 3.68            | 1.90               |
| RP11-421L21.2  | ENSG00000235795 | 1p21        | 3.60            | 2.15               |
| C22orf24       | ENSG00000128254 | 22q12       | 3.53            | 2.14               |
| RP1-45I4.3     | ENSG00000227192 | 6q24        | 3.52            | 1.85               |
| MIR29A         | ENSG00000226380 | 7q32        | 3.52            | 2.19               |
| LINC01481      | ENSG00000257815 | 12q15       | 3.49            | 1.85               |
| WI2-85898F10.1 | ENSG00000235091 | 22q13       | 3.46            | 3.46               |
| RP11-253L19.3  | ENSG00000255670 | 12p13       | 3.45            | 1.92               |
| AC127904.2     | ENSG00000230732 | 3q29        | 3.40            | 1.95               |
| RP11-646J21.2  | ENSG00000255133 | 11p13       | 3.32            | 1.41               |
| RP11-203J24.8  | ENSG00000227218 | 9q34        | 3.31            | 2.94               |
| LINC01619      | ENSG00000257242 | 12q21       | 3.29            | 3.87               |
| CTB-131B5.5    | ENSG00000254363 | 5q31        | 3.29            | 1.57               |
| RP11-3D4.3     | ENSG00000259408 | 15q14       | 3.25            | 1.40               |
| RORA-AS1       | ENSG00000245534 | 15q22       | -4.57           | 0.55               |
| DDX11-AS1      | ENSG00000245614 | 12p11       | -4.22           | 0.50               |

**Supplementary Table S8.** Molecular and clinical characteristics of 55 MM patients.

| <b>Sample Features</b>                     | <b>N/%</b>            |
|--------------------------------------------|-----------------------|
| <b>Patients</b>                            | <b>55</b>             |
| <b>Median age at diagnosis</b>             | <b>67</b>             |
| <b>Bone damage</b>                         | <b>60%</b>            |
| <b>Median BM-PC infiltrate</b>             | <b>50%</b>            |
| <b>del(13)</b>                             | <b>53%</b>            |
| <b>del(17)</b>                             | <b>7%</b>             |
| <b>t(4;14)</b>                             | <b>13%</b>            |
| <b>t(11;14)</b>                            | <b>20%</b>            |
| <b>MAF-trx</b>                             | <b>7%</b>             |
| <b>HD</b>                                  | <b>31%</b>            |
| <b>1q gain</b>                             | <b>49%</b>            |
| <b>1p loss</b>                             | <b>11%</b>            |
| <b>International Staging System (ISS)</b>  |                       |
| stage I                                    | <b>19</b>             |
| stage II                                   | <b>19</b>             |
| stage III                                  | <b>17</b>             |
| <b>R-ISS</b>                               |                       |
| stage I                                    | <b>12</b>             |
| stage II                                   | <b>34</b>             |
| stage III                                  | <b>9</b>              |
| <b>Median overall survival (OS)</b>        | <b>52 months</b>      |
| <b>Median time to next treatment (TNT)</b> | <b>23 months</b>      |
| <hr/>                                      |                       |
| <b><i>globaltest</i> OS</b>                | <b><i>p</i>-value</b> |
| PRIMER 5'                                  | 0.903                 |
| PRIMER 3'                                  | 0.977                 |
| <hr/>                                      |                       |
| <b><i>globaltest</i> TNT</b>               | <b><i>p</i>-value</b> |
| PRIMER 5'                                  | 0.655                 |
| PRIMER 3'                                  | 0.933                 |
