# Supplementary material
Source: PubMed Central journal article supplement (PMC6355474)
Supplement: 2018_201301-Disclosures_and_Contributions.pdf [file 2018_201301-Disclosures_and_Contributions.pdf]

Haematologica  
HAEMATOL/2018/201301  
Version 3

Long non-coding RNA NEAT1 shows high expression unrelated to  
molecular features and clinical outcome in multiple myeloma

Elisa Taiana, Domenica Ronchetti, Vanessa Favasuli, Katia Todoerti,  
Martina Manzoni, Nicola Amodio, Pierfrancesco Tassone, Luca Agnelli,  
and Antonino Neri

Disclosures: none

Contributions: ET, VF, KT, and MM performed the experiments DR, LA performed data  
analysis NA, PT critically revision the manuscript DR, LA, and AN supervised the study and  
wrote the manuscript
